1  
2 **Relating SARS-CoV-2 shedding rate in wastewater to daily positive tests data:**  
3 **A consistent model based approach**  
4

5 **M. Petala<sup>1</sup>, M. Kostoglou<sup>2</sup>, Th. Karapantsios<sup>2</sup>, Ch. Dovas<sup>3</sup>, Th. Lytras<sup>4,5</sup>, D. Paraskevis<sup>6</sup>, E.**  
6 **Roilides<sup>7</sup>, A. Koutsolioutsou-Benaki<sup>8</sup>, , G. Panagiotakopoulos<sup>4</sup>, V. Sypsa<sup>6</sup>, S. Metallidis<sup>9</sup>, A. Papa<sup>10</sup>,**  
7 **E. Stylianidis<sup>11</sup>, A. Papadopoulos<sup>12</sup>, S. Tsiodras<sup>6</sup>, N. Papaioannou<sup>3</sup>**

8 <sup>1</sup>Laboratory of Environmental Engineering & Planning, Department. of Civil Engineering, Aristotle University of  
9 Thessaloniki, Thessaloniki, 54 124, Greece

10 <sup>2</sup>Laboratory of Chemical and Environmental Technology, Dept. of Chemistry, Aristotle University of Thessaloniki,  
11 54 124 Thessaloniki, 54124, Greece

12 <sup>3</sup>Faculty of Veterinary Medicine, School of Health Sciences, Aristotle University of Thessaloniki, Thessaloniki,  
13 54124, Greece

14 <sup>4</sup>National Public Health Organization, Athens, Greece

15 <sup>5</sup>European University Cyprus, Nicosia, Cyprus

16 <sup>6</sup>National and Kapodistrian University of Athens, Athens, Greece

17 <sup>7</sup>Infectious Diseases Unit and 3rd Department of Pediatrics, Aristotle University School of Health Sciences,  
18 Hippokraton Hospital, Thessaloniki, 54642, Greece

19 <sup>8</sup>Department of Environmental Health, Directory of Epidemiology and Prevention of Non Communicable Diseases  
20 and Injuries, National Public Health Organization, Athens, Greece

21 <sup>9</sup>Department of Haematology, First Department of Internal Medicine, Faculty of Medicine, AHEPA General  
22 Hospital, Aristotle University of Thessaloniki, Thessaloniki, 54636, Greece

23 <sup>10</sup>Department of Microbiology, Medical School, Aristotle University of Thessaloniki, Thessaloniki, 54124 Greece

24 <sup>11</sup>School of Spatial Planning and Development, Faculty of Engineering, Aristotle University of Thessaloniki, 54124,  
25 Greece

26 <sup>12</sup>EYATH S.A., Thessaloniki Water Supply and Sewerage Company S.A., Thessaloniki, 54636, Greece

27

28 **ABSTRACT**

29 During the COVID-19 pandemic, wastewater-based epidemiology (WBE) has been engaged to  
30 complement medical surveillance and in some cases to also act as an early diagnosis indicator of viral  
31 spreading in the community. Most efforts worldwide by the scientific community and commercial  
32 companies focus on the formulation of protocols for SARS CoV-2 analysis in wastewater and approaches  
33 addressing the quantitative relationship between WBE and medical surveillance are lacking. In the  
34 present study, a mathematical model is developed which uses as input the number of daily positive  
35 medical tests together with the highly non-linear shedding rate curve of individuals to estimate the  
36 evolution of virus shedding rate in wastewater along calendar days. A comprehensive parametric study  
37 by the model using as input actual medical surveillance and WBE data for the city of Thessaloniki  
38 (~700,000 inhabitants, North Greece) during the outbreak of November 2020 reveals the conditions  
39 under which WBE can be used as an early warning tool for predicting pandemic outbreaks. It is shown  
40 that early warning capacity is different along the days of an outbreak and depends strongly on the  
41 number of days apart between the day of maximum shedding rate of infected individuals in their  
42 disease cycle and the day of their medical testing. The present data indicate for Thessaloniki an average  
43 early warning capacity of around 2 days. Moreover, the data imply that there exists a proportion  
44 between unreported cases (asymptomatic persons with mild symptoms that do not seek medical advice)  
45 and reported cases. The proportion increases with the number of reported cases. The early detection  
46 capacity of WBE improves substantially in the presence of an increasing number of unreported cases.  
47 For Thessaloniki at the peak of the pandemic in mid-November 2020, the number of unreported cases  
48 reached a maximum around 4 times the number of reported cases.

49

50 **HIGHLIGHTS**

- 51 • Model estimates viral load evolution in wastewater from infected people dynamics
- 52 • Identifying actual conditions for which WBE can be used as an early warning tool
- 53 • Early warning capacity increases with an increasing number of unreported cases
- 54 • In Thessaloniki Nov20 outbreak, the early warning capacity of WBE was about 2 days
- 55 • In Thessaloniki Nov20 outbreak, unreported cases were up to 4 times reported cases

56

57

## 58 INTRODUCTION

59 In the COVID-19 pandemic, wastewater-based epidemiology (WBE) has become an important  
60 tool, supplementing public health surveillance, in the hands of scientists, medical experts, and state  
61 officials to evaluate the spread of SARS-CoV-2 in the community <sup>(Ia Rosa et al., 2020; Medema et al., 2020b; Wurtzer1 et al.,  
62 n.d.)</sup>. This was more so after the Centers for Disease Control and Prevention (CDC) adopted wastewater  
63 disease surveillance as a valid monitoring tool and provided guidance and recommendations for the  
64 selection and application of testing methods (CDC, 2021). The latter cover issues from sample collection  
65 and sample processing to RNA measurement and use of laboratory controls for the estimation of the  
66 performance of the applied methods and of data quality. Laboratory controls deal with difficulties  
67 arising from the chemical and biological variability of wastewater quality across different places and  
68 over time, e.g. due to season, weather, human activities etc., and also cope with problems of proper  
69 RNA extraction and quantification, elimination of inhibition and contamination of reagents.

70 The so-called matrix recovery controls suggested by CDC refer exclusively to the amount of virus  
71 lost during sample processing. However, it is well known that viruses strongly adsorb, and so get  
72 inaccessible (“lost”), in the pores of solid particles suspended in wastewater in sewerage networks  
73 (Sellaoui et al., 2020; Ye, 2018). Therefore, if WBE studies aim to quantify the virus shedding rate at the  
74 source (households) from analysis of samples taken at the entrance of wastewater treatment plants

75 (WTP) then it is of paramount importance to appraise the amount of virus lost in sewerage networks.  
76 Determining the extent of recovery, as suggested by CDC, by spiking techniques in samples obtained at  
77 the entrance of WTP is incapable of describing the amount of virus lost in sewerage networks. This is  
78 because such samples have traveled in sewerage pipes for hours and so have (most of) their adsorption  
79 sites saturated with adsorbed species. Desorption of spiked material would have been completely  
80 different if a sample had been taken fresh at a shedding spot, i.e., from the sanitary plumbing system of  
81 a building.

82 Recently, a mathematical model has been proposed to account for virus loss in sewerage  
83 networks by means of adsorption of virus on porous particles suspended in wastewater(Petala et al.,  
84 2021). To do so, the model rationalizes the SARS-CoV-2 concentration in samples taken at the entrance  
85 of WTP with respect to certain quality characteristics of wastewater samples. Rationalization is based on  
86 rigorous physicochemical phenomena in adsorption (and not on a statistical dependence of virus  
87 concentration on wastewater parameters), also including the effect of large-scale topological complexity  
88 of actual sewage networks. At the examined period of time (April to June 2020), the rationalized  
89 decreasing shedding rate was in agreement with the observed clinical conditions, contrary to the non-  
90 rationalized data which showed a different picture. Yet, even with rationalized data it is still difficult to  
91 make the critical step ahead and associate the virus shedding rate with the number of cases.

92 There are several reasons for the discrepancy between viral shedding rate in wastewater and  
93 number of infected people (cases) reported by public health surveillance. Limitations in the capacity of  
94 medical testing, strict criteria for the application of medical testing and parts of the population being  
95 reluctant to seek medical care are responsible for underdiagnosis of cases, mainly asymptomatic cases  
96 or patients with mild symptoms who are not tested. These factors lead to reporting a lower number of  
97 cases than the actual one. On the other hand, poor recovery in the collected wastewater samples and  
98 virus loss in sewage networks, along with ineffectiveness to properly rationalize for the latter, lead to a

99 smaller measured concentration of virus in the collected samples and, thus, to a lower estimated viral  
100 shedding rate than the actual one.

101 The time delay between the onset of patients' viral shedding in infected people and symptoms  
102 onset that prompts patients being tested, is another reason for discrepancy. Several reports in literature  
103 indicate a time delay up to 8 days between wastewater signal and infected cases reported in public  
104 health surveillance system (e.g.(D'Aoust et al., 2021; Nemudryi et al., 2020; Peccia et al., 2020)). This is  
105 in line with the reported incubation period of around 6 days from exposure/infection to onset of  
106 symptoms of COVID-19 (Guan et al., 2020; Lauer et al., 2020; Li et al., 2020). Therefore, the discrepancy  
107 between the onset of viral shedding and the onset of symptoms is actually an advantage that might  
108 explain the early detection capacity of WBE.

109 Another important reason of discrepancy between daily reports of wastewater viral titers and  
110 daily reports of new confirmed cases is the cumulative character of viral shedding rate in wastewater  
111 during the disease. Several clinical studies 14–16 showed that viral shedding is not uniform during the  
112 disease, but there is a maximum shedding rate in the very acute phase of infection, probably even  
113 before respiratory symptoms appear, being followed by an exponential decline in subsequent days. If  
114 one considers that shedding lasts at least 3-4 weeks after the inception of symptoms 14,15. it is  
115 apparent that daily wastewater viral titers correspond more to the cumulative shedding of infected  
116 people rather than to the shedding of the daily new cases. It must be stressed here that the evidence  
117 from clinical studies is limited, and only for samples collected from hospitalized patients, thus after  
118 symptoms onset, so one should be extremely careful in estimating shedding rates at the first days right  
119 after infection.

120 If one aims to associate wastewater surveillance data with public health surveillance data, the  
121 different sources of bias between these data should be also taken into account. Laboratory practice  
122 shows that variation in wastewater data is considerably high from one day to the next because of the

123 many experimental parameters that are involved, e.g., individual's shedding rate (orders of magnitude  
124 variation among infected people(Zheng et al., 2020); sampling protocol, sample concentration  
125 techniques, RNA extraction methodology, normalization with respect to population indicators and flow  
126 rate, inhibition assessment in RNA recovery, RNA quantification, etc. On the other hand, public health  
127 surveillance is susceptible to a systematic bias because of limitations in the capacity of medical testing  
128 along with the unpredictable human behavior under stressful conditions. In principle, one should be  
129 concerned about the correctness of both wastewater viral measurements and clinical testing data.

130 The goal of this work is to setup a methodology for the consistent comparison between the  
131 number of infected people reported by clinical surveillance and SARS-CoV-2 RNA concentration in  
132 wastewater samples. To do so, a model is developed for the estimation of the evolution of virus  
133 shedding rate in a sewage system based on the daily positive medical tests. Apart from corrections  
134 based on the laboratory controls suggested by CDC, virus shedding rate data are further rationalized  
135 with respect to physicochemical parameters of wastewater to account for virus loss by adsorption to  
136 sewage solids (Petala et al., 2021). To increase accuracy, clinical testing data are based on the date of  
137 specimen collection and not on the reporting date. The model is first developed in a generalized  
138 continuous time regime and then it is transformed to its discrete counterpart dictated by the daily basis  
139 data.

140

## 141 **METHODS**

### 142 **Sampling**

143 Wastewater samples were collected at the exit of Thessaloniki's (a city at North Greece) main sewerage  
144 pipe, right before the entrance at the wastewater treatment plant of the city, as described  
145 elsewhere(Petala et al., 2021). This plant serves an estimated population of about 700,000 people. The

146 present work reports 24-hours composite samples (1L each) taken three times per week (Monday-  
147 Wednesday-Friday) from October 5<sup>th</sup>, 2020 until January 6<sup>th</sup>, 2021. This period includes the second wave  
148 burst of COVID-19 for Thessaloniki in November 2020 which was the worst ever in the whole country.  
149 Typical range of values of the physicochemical parameters of wastewater samples for the examined  
150 period are displayed in Table 1 (supplementary materials). These parameters were employed in the  
151 rationalization of the measured viral concentration with respect to quality characteristics of wastewater  
152 according to Petala et al. (Petala et al., 2021).

### 153 **Virus concentration**

154 Upon wastewater collection, 200 mL of each wastewater sample was centrifuged at 4000xg for 30 min  
155 to remove particles and pH of the supernatant was adjusted to 4 using a solution of 2.0 M HCl. An  
156 aliquot of 40 mL supernatant was then passed through an electronegatively charged surface of 0.45 µm-  
157 Ø47 mm cellulose nitrate HA membrane ((HAWP04700; Merck Millipore Ltd., Tullagreen, Ireland).  
158 Filtration was performed using a magnetic funnel mounted on a glass filtration flask (Pall Corporation)  
159 Filtration step was conducted in triplicate and membranes were stored in 15 mL falcon tubes for further  
160 processing of RNA extraction and virus quantification.

### 161 **RNA extraction and virus quantification**

162 For each sewage sample, three electronegative membranes were individually subjected to phenol-  
163 chloroform-based RNA extraction process (Chaintoutis et al., 2019) coupled with magnetic bead binding.  
164 Each membrane filter was rolled into a Falcon™ 15 mL conical centrifuge tube with the top side facing  
165 inward. The following were added sequentially, a) 900 µL of guanidinium isothiocyanate-based “Lysis  
166 buffer I” [5M guanidinium isothiocyanate, 25mM EDTA, 25mM sodium citrate (pH 7.0), 25mM  
167 phosphate buffer (pH 6.6)] containing 1% N-Lauroylsarcosine, 2% Triton X-100, 2% CTAB and 2% PVP, b)  
168 18µl β-mercaptoethanol, c) 300µl H<sub>2</sub>O, mixed thoroughly by inversion, and each tube was incubated at

169 4 °C on horizontal rotator (50 rpm) for 10-30 min. 1200 µl of “Lysis buffer II” were added [prepared by  
170 mixing 152.5gr guanidinium hydrochloride, 31.25 ml of 2M acetate buffer (pH 3.8) and water-saturated  
171 phenol stabilized (pH4), up to 500ml final volume], followed by incubation 10 min / RT on horizontal  
172 rotator (150 rpm). The liquid phase was transferred on a 2-mL microcentrifuge tube and clarified by  
173 centrifugation (21,000×g, 5 min, 4 °C). 1600 µl were transferred to a new tube, 200 µl chloroform-  
174 isoamyl alcohol (24:1) were added and shaken vigorously for 30 s followed by incubation (-20 °C, 30  
175 min) and centrifugation (21,000×g, 10 min, 4 °C). 800 µl of the upper aqueous phase were transferred  
176 and mixed with 667µl isopropanol and 20µl of magnetic beads (IDEXX Water DNA/RNA Magnetic Bead  
177 Kit), followed by incubation 15 min / RT on horizontal rotator (150 rpm). The beads were washed  
178 according to the manufacturer’s protocol, using the magnetic extraction reagents. Elution of RNA was  
179 done in 100 µl buffer followed by filtering using OneStep PCR inhibitor removal kit (Zymoresearch).

180 SARS-CoV-2 quantified RNA (1x 10<sup>6.3</sup> genomic copies) from human clinical samples was added to a  
181 subset of concentrates to estimate the recovery efficiency and reproducibility of the RNA extraction  
182 procedure. Similarly, heat inactivated SARS-CoV-2 from human clinical samples was spiked (1x 10<sup>7</sup> viral  
183 particles) in a subset of sewage samples to assess the recovery and reproducibility of the virus  
184 concentration procedure.

185 Each RNA extract was subjected to real-time RT-PCR for SARS-CoV-2 quantification in triplicates. Two  
186 primer/probe sets were utilized: the N2 set from CDC that targets the nucleocapsid (N) gene and the set  
187 targeting the genomic region that encodes the E protein (Corman et al., 2020). The assays were  
188 performed on a CFX96 Touch™ Real-Time PCR Detection System (Bio-Rad Laboratories, Hercules, CA,  
189 USA). Reactions were considered positive if the cycle threshold was below 40 cycles. Calibration curves  
190 were generated using the synthetic single-stranded RNA standard “EURM-019” (Joint Research Centre,  
191 European Commission). The possible presence of RT-PCR inhibitors in each RNA extract was assessed in



192 duplicates using spiked EURM-019 included at ~1000 copies in additional RT-PCR reactions. Inhibition  
193 was expressed as % reduction in reported copy number, compared to the sum of spiked EURM-019  
194 copies and the mean value of measured SARS-CoV-2 genomic copies in the non-spiked RNA. SARS-CoV-2  
195 viral load in each sewage sample was expressed as mean  $\pm$  standard deviation genome copies per liter,  
196 after correcting for RT-PCR inhibition if present, and recovery efficiencies (virus concentration and RNA  
197 extraction). Precision of each individual sewage sample quantification was assessed using the coefficient  
198 of variation (CV) of the estimated SARS-CoV-2 viral load of the three electronegative membranes  
199 processed. We set our precision threshold at 35% CV for each sewage sample measurement.

## 200 **Epidemiological data**

201 Daily numbers of COVID-19 infected people reported in the city of Thessaloniki, adjusted to specimen  
202 collection date, were obtained from the National Public Health Organization (National Public Health  
203 Organization, 2020). These data reflect residents found positive when tested in public and private  
204 laboratories. Data are presented for the period between September 1<sup>st</sup>, 2020 and January 6<sup>th</sup>, 2021  
205 (original data are provided in supplementary materials).

## 206 **Problem formulation**

207 A model is developed for estimating the evolution of virus shedding rate to sewage system based on the  
208 official (announced by the state) results of daily positive tests (cases), registered by the date of  
209 specimen collection and not by the date of public reporting. There is typically a delay of few days  
210 between specimen collection and public reporting. The model is first developed in a generalized  
211 continuous time regime and then it is transformed to its discrete counterpart dictated by the daily basis  
212 data.

213 Let us denote as  $f(t)$  ( $t$ : calendar day) the evolution of positive test counts density with  $f(t)dt$  being the  
214 number of positive tests in the time period between  $t$  and  $t+dt$ . The first step is to transform the  
215 function  $f(t)$  to the function  $F(t)$  which denotes the total number of reported infected people at time  $t$ . It  
216 is essential to stress here that  $F(t)$  includes people that at time  $t$  either had already a positive test or  
217 they are in the first days after infection, so do not have symptoms, but still they shed virus and will be  
218 tested positive later after their onset of symptoms. The effect of infected but unreported people, such  
219 as asymptomatic ones and those not tested because of mild symptoms, is dealt with later.

220 In order to proceed let us consider the course of the disease of an infected person: Infection starts  
221 (disease incidence) at day  $\tau=1$ , detection occurs (specimen collection) at day  $\tau=\tau_d$  and end of viral  
222 shedding occurs at day  $\tau_e$ . The number of days for detection and end of shedding are in general not the  
223 same among cases but they show a dispersion which can be described by the respective probability  
224 density functions  $P_d(\tau_d)$  and  $P_e(\tau_e)$ . It is understood that both functions take non-zero values only in  
225 restricted domains of their arguments. The limits of these domains are denoted as  $\tau_{d1}$ ,  $\tau_{d2}$  and  $\tau_{e1}$ ,  $\tau_{e2}$ ,  
226 respectively. The functions  $P_d$  and  $P_e$  satisfy the conditions:

$$227 \int_{\tau_{d1}}^{\tau_{d2}} P_d(\tau_d) d\tau_d = 1 \quad (1a)$$

$$228 \int_{\tau_{e1}}^{\tau_{e2}} P_e(\tau_e) d\tau_e = 1 \quad (1b)$$

$$229 \int_{\tau_{d1}}^{\tau_{d2}} \tau_d P_d(\tau_d) d\tau_d = \tau_{d,av} \quad (1c)$$

$$230 \int_{\tau_{e1}}^{\tau_{e2}} \tau_e P_e(\tau_e) d\tau_e = \tau_{e,av} \quad (1d)$$

231 where the subscript "av" denotes the average value of the corresponding variable. Taking into account  
232 the above definitions, it can be shown that the functions  $F(t)$  and  $f(t)$  can be related to each other as:

$$233 \quad F(t) = \int_{\tau_{d1}}^{\tau_{d2}} \int_{\tau_{e1}}^{\tau_{e2}} P_d(\tau_d) P_e(\tau_e) \int_{t+\tau_d-\tau_e}^{t+\tau_d} f(x) dx d\tau_e d\tau_d \quad (2)$$

234 This relation is actually the mathematical expression of the statement that infected persons at time  $t$   
235 include those already detected and those to be detected in the next days. In principle, a multiplication  
236 of this number by the average shedding rate per person would give the required global shedding rate  
237 evolution function  $R(t)$ . Such averaging over all infected individuals would have been sufficient for data  
238 reduction purposes only if the shedding rate of individuals during their disease cycle had a constant  
239 value. However, as already explained, this is not true since there is a strong variation in virus  
240 concentration in stool not only among infected individuals but also across the days of their disease cycle.

241 Let us denote this variable function of the daily shedding rate per person as  $S(\tau)$ , ( $\tau$ : day of the disease  
242 onset). It has been shown that not only  $S$  is not a constant, but on the contrary, it is a strong function of  
243 its argument  $\tau$ . In order to incorporate the effect of function  $S(\tau)$  to the global shedding rate  $R(t)$ ,  
244 knowledge of the distribution of disease days among the infected population is required. The  
245 corresponding function is denoted as  $F^*(\tau, t)$  and represents the density function of the distribution of  
246 disease days,  $\tau$ , at time  $t$ . It is fruitful to decompose the function  $F^*(\tau, t)$  into the product of the total  
247 number of infected people and the probability density function of the days of infection as  
248  $F^*(\tau, t) = F(t)g(\tau, t)$  where  $g(\tau, t)$  is a probability density function with respect to  $\tau$  and satisfies the  
249 condition:

$$250 \quad \int_0^{\tau_{e2}} g(\tau, t) d\tau = 1 \quad (3)$$

251 It can be shown that the function  $g$  can be derived as

$$252 \quad g(\tau, t) = \frac{1}{F(t)} \int_{\tau_{d1}}^{\tau_{d2}} \int_{\tau_{e1}}^{\tau_{e2}} P_d(\tau_d) P_e(\tau_e) f(t + \tau_d - \tau) U(\tau_e - \tau) d\tau_e d\tau_d \quad (4)$$

253 where  $U$  is a step function taking the values 0 for negative and 1 for positive argument. The domain of  
254 definition of the above expression is from  $t = \tau_{e2} - \tau_{d1}$  to  $t = T - \tau_{d2}$  in the case of  $f(t)$  known from  $t=1$  to  $t=T$ .

### 255 *Parametrization of the function $S(\tau)$*

256 In order to proceed, one should know the function of virus shedding rate in stool per person and per day  
257 of the disease. A first question is how the onset of infection (i.e., time  $\tau=1$ ) is defined. There are several  
258 possibilities for this definition but in the present context the most relevant one is that  $\tau=1$  day is the first  
259 day of non-zero shedding of virus in the stool of a person.

260 There are only a few available clinical studies in literature (e.g. Wölfel et al.(Wölfel et al., 2020), Huang  
261 et al.(Huang et al., 2020); Tan et al.(Tan et al., 2020)) referring to the kinetics of SARS-CoV-2 shedding  
262 rate in stool during the course of disease (from  $\tau=1$  to  $\tau_e$ ). To our best knowledge, from those studies  
263 only the work of Wölfel et al.(Wölfel et al., 2020) reports actual viral concentrations whereas all other  
264 studies refer to Ct values from molecular analysis. It must be mentioned that these studies present data  
265 exclusively from hospitalized patients, thus from people presenting moderate to severe symptoms.  
266 Apparently, it is not easy to collect stool samples from infected persons prior the onset of symptoms,  
267 and as a result, asymptomatic or mild cases are not registered in clinical studies. A first common  
268 observation in these studies is that virus concentration in stool among infected persons vary by several  
269 orders of magnitude. Therefore, here an average shedding function per person will be employed and the  
270 significance of variations among individuals will be discussed on statistical terms. Interestingly, many  
271 past studies assumed in addition a uniform with respect to time shedding rate despite the orders of

272 magnitude variability across the course of the disease (Ahmed et al., 2020; Gonzalez et al., 2020;  
273 Medema et al., 2020a; Saththasivam et al., 2021). This assumption simplifies the algebra of the problem  
274 enormously but it is incorrect.

275 A thorough fitting procedure of the virus titers data in stool of Wölfel et al. (Wölfel et al., 2020), led to a  
276 peculiar two-steps model (Miura et al., 2021): a first step with zero viral shedding, where virus load  
277 simply accumulates in infected hosts up to a maximum concentration reached at the day of symptoms  
278 onset, and a subsequent second step characterized by viral shedding at an exponentially decreasing  
279 concentration over the days of the disease. This fitting yields a Gamma function which degenerates to  
280 an exponential one. Evidently, it is quite arbitrary to assume that there is an initial viral accumulation  
281 period up to a maximum concentration without any shedding at all.

282 Here, an even more general parameterization is introduced. The average over the infected persons  
283 function is represented as a product of the following factors: (1) the average stool amount produced by  
284 a person per day,  $A$  ( $g_{\text{stool}}/\text{day}$ ), (2) the maximum in time (averaged over infected individuals) virus  
285 concentration in stool,  $B$  ( $g_{\text{virus}}/g_{\text{stool}}$ ) and (3) a time distribution function  $s(\tau)$  of this concentration. This  
286 distribution is assumed to consist of an exponential increase from a minimum initial value up to a  
287 maximum value being followed by an exponential decrease down to a minimum final value. These  
288 minimum initial and final values of the distribution are assumed to be 1% of the maximum value. As a  
289 result, the whole distribution spans shedding rates over two orders of magnitude. This assumption may  
290 be changed to any other option, e.g., to 1‰ (three orders of magnitude span), but the approach  
291 remains the same. However, a two orders of magnitude span represents adequately most of the  
292 shedding of infected individuals during a typical course of the disease, so it is adopted herein. A new  
293 parameter is introduced,  $\tau_a$ , which denotes the value of  $\tau$  days at which the maximum virus

294 concentration in stool, i.e. maximum shedding rate, occurs. Summarizing, the above the function

295  $S(\tau; \tau_a, \tau_e)$  is given as:

$$296 \quad S(\tau; \tau_a, \tau_e) = ABs(\tau; \tau_a, \tau_e) \quad (5)$$

297 where  $s(\tau; \tau_a, \tau_e)$  is

$$298 \quad s = 0.01 \exp(4.6\tau/\tau_a) \quad \tau < \tau_a \quad (6a)$$

$$299 \quad s = \exp(4.6(\tau - \tau_a)/(\tau_e - \tau_a)) \quad \tau > \tau_a \quad (6b)$$

300 The shape of the function  $s(\tau)$  for several pairs of  $(\tau_a, \tau_e)$  - (6,32), (12,32), (9,25) - is shown in **Figure 1**. The  
301 particular parametrization of the function  $S$  proposed in the present work is more realistic than the  
302 Miura et al. (Miura et al., 2021) model, as it incorporates viral shedding even in the early days of the  
303 disease and before the peak maximum (peak) viral concentration in stool is reached. Such early  
304 shedding in stool is in line with clinical studies reporting patients with shedding in oropharyngeal swabs  
305 (He et al., 2020) and gastrointestinal symptoms (Siegel et al., 2020) a few days before the appearance of  
306 respiratory symptoms. Nevertheless, one should keep in mind that respiratory shedding is only a proxy  
307 for fecal shedding. In addition, the proposed function  $S$  is very attractive because there is one to one  
308 correspondence between the parameters and major features of the function. The height (amplitude) of  
309  $S$  is determined by the product  $AB$ , its time length is determined by the parameter  $\tau_e$  and its skewness  
310 by the parameter  $\tau_a$ . In particular, the closer  $\tau_a$  is to  $\tau_e/2$  the smaller the skewness is. It must be stressed  
311 that the proposed parametrization of  $S$  does not require explicit information on the duration of the  
312 incubation period after infection nor on the day of symptoms onset. What actually matters in the  
313 context of the present analysis is the day of the maximum shedding rate as this is described by the  
314 parameter  $\tau_a$ . Some clinical studies indicated that this maximum might occur at the end of the  
315 incubation period which is taken also as the day of symptom onset (Huang et al., 2020; Miura et al.,

316 2021; Tan et al., 2020). However, in the present formulation this day is flexible and can be anytime from  
 317 the moment of infection to the end of the shedding period (i.e., the active days of the disease).

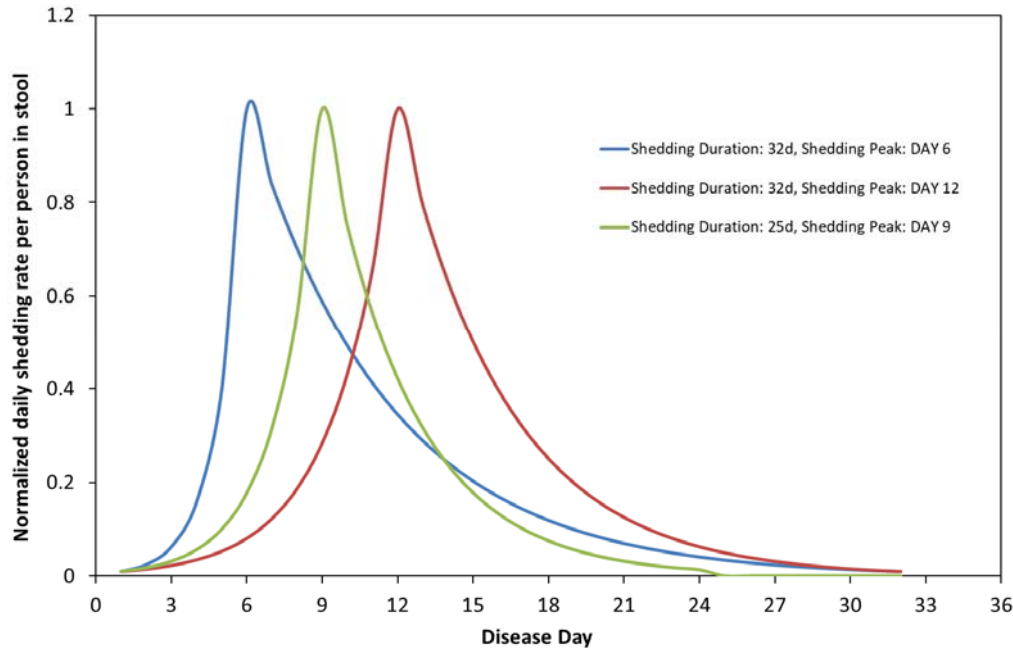

318

319 **Figure 1.** Time distribution of normalized shedding rate per person in stool at different shedding  
 320 durations and shedding peak days.

321 The final expression for the global shedding rate is taken by integrating the individual's shedding rate  
 322 over the days of the disease.

$$323 \quad R(t) = \int_0^{\tau_{e2}} \int_{\tau_{d1}}^{\tau_{d2}} \int_{\tau_{e1}}^{\tau_{e2}} P_d(\tau_d) P_e(\tau_e) f(t + \tau_d - \tau) S(\tau; \tau_a, \tau_e) U(\tau_e - \tau) d\tau_e d\tau_d d\tau \quad (7)$$

324 The development up to now is rather complex and includes several unknown probability density  
 325 functions. In the absence of any information about them, it is convenient to consider them as Dirac delta  
 326 functions. In this way, we assign to each distribution its average value. This approach not only simplifies  
 327 considerably the mathematical problem but it also allows -through sensitivity analysis- to assess bounds

328 on the effect of using a different distribution than the Dirac delta function. This is based on the principle  
 329 that any secondary feature of a distribution has much smaller effect on the result than its average value.  
 330 By considering the relations  $P_d(\tau_d)=\delta(\tau_d-\tau_{d,av})$  and  $P_e(\tau_e)=\delta(\tau_e-\tau_{e,av})$  (where  $\delta$  denotes the Dirac delta  
 331 function) and substituting them in equations (2), (4), (7) leads after some algebra to (the subscript "av"  
 332 is dropped in the following for clarity):

$$333 \quad F(t) = \int_{t+\tau_d-\tau_e}^{t+\tau_d} f(x)dx d\tau_e d\tau_d \quad (8)$$

$$334 \quad g(\tau, t) = \frac{f(t + \tau_d - \tau)U(\tau_e - \tau)}{F(t)} \quad (9)$$

$$335 \quad R(t) = F(t) \int_0^{\tau_e} g(\tau, t)S(\tau; \tau_a, \tau_e)d\tau \quad (10)$$

336 The above set of equations is discretized to be compatible with the present data. These data refer to  
 337 daily values of virus shedding rate so a finite volume discretization is followed here. Let us denote as  $f_i$   
 338 the number of positive medical tests at day  $i$  (measurement period  $i=1$  to  $N$ ),  $F_i$  is the total number of  
 339 infected people (that is daily cases) at day  $i$  (with the specimen of their positive test collected at day  $i$ ),  $R_i$   
 340 the shedding rate at day  $i$  and  $g_{i,j}$  the probability of being at the  $j$ -th day of the disease at the calendar  
 341 day  $i$ . The governing equations take the form:

$$342 \quad F_i = \sum_{j=i-m}^{i+n} f_j \quad (11)$$

$$343 \quad g_{i,j} = \frac{f_{j-m+i}}{F_i} \quad (12)$$



344 
$$R_i = \sum_{j=i-m}^{i+n} g_{i,j} S_j \quad (13)$$

345 for  $i > m$  and  $i < N - n$

346 where  $S_j$  is the shedding rate per person at the  $j$ -th day of the disease ( $m = \tau_e - \tau_d$ ,  $n = \tau_d$ )

347

## 348 RESULTS

349 **Figure 2** displays medical surveillance data reported for the city of Thessaloniki (~ 700,000 inhabitants)  
350 (National Public Health Organization, 2020). More specifically, it presents the daily number of infected  
351 people versus the date of their specimen collection for medical testing. The date of specimen collection  
352 is back-dated by 1 to 4 days (median of 3 days) from the date of reporting by the Hellenic National  
353 Public Health Organization. The difference between the two characteristic dates is small but the  
354 epidemiological data adjusted to the date of specimen collection are more appropriate to compare with  
355 wastewater measurements because they are better associated with the date of infection and the date  
356 of symptoms onset. Nevertheless, if early warning by wastewater measurements is the stake then  
357 comparisons should be made with medical surveillance data as announced, i.e., based on the date of  
358 reporting.

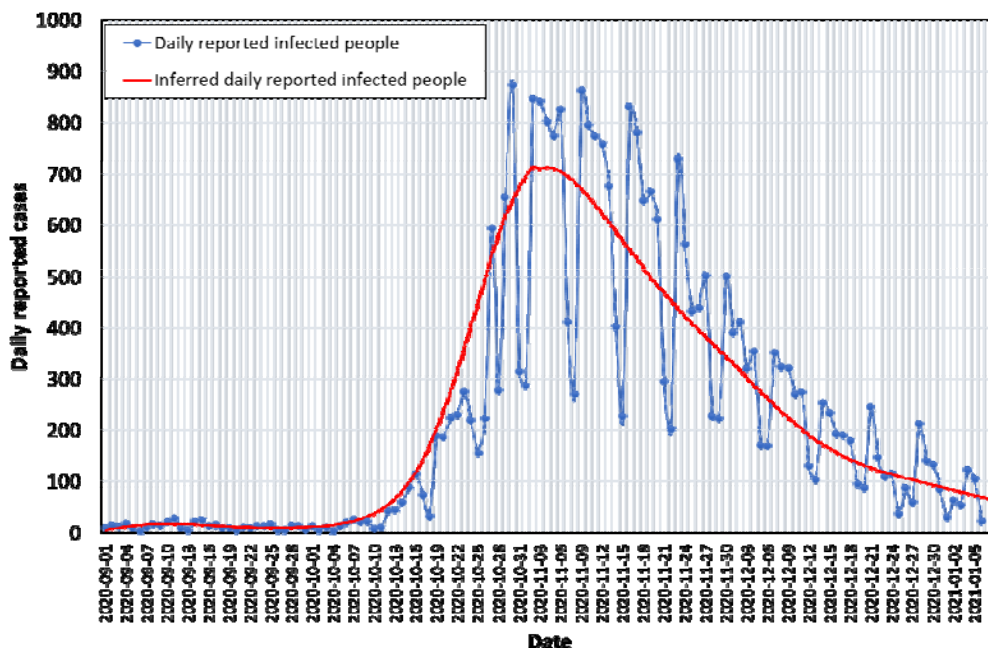

359

360 **Figure 2.** Medical surveillance data reported for the city of Thessaloniki from September 1<sup>st</sup>, 2020 to  
361 January 6<sup>th</sup>, 2021 and corresponding Bayesian model fit curve.

362

363 The presented data cover the period from September, 1<sup>st</sup> 2020 to January 6<sup>th</sup>, 2021. A fitting curve is  
364 fitted over the raw data to smooth out the noise. Most of the parametric study that follows is  
365 performed with respect to this curve, to skip the noise. Following the loose atmosphere of Summer  
366 2020, in September and October there was no strict quarantine in the city and only a modest rule for  
367 social distancing was active along with a rule for limited number of people in confined places, like stores  
368 and restaurants. In September and the first 10 days of October the daily reported cases were always  
369 well below 20 and often even below 10. At around mid-October 2020 the number of infected cases  
370 started to escalate exponentially. In just two weeks, the number of cases increased about ten-fold in just  
371 two weeks. This dramatic rise was consistent with the about 2.7 days doubling time of the epidemic  
372 reported for European countries in the absence of control measures (SET-C Steering Committee, 2020).

373 A strict lock-down was imposed on the city on November 2<sup>nd</sup> meant to suppress the outburst of the  
374 disease. Between Nov 3<sup>rd</sup> and Nov 17<sup>th</sup> the number of infected cases fluctuated approximately from 800  
375 to 300 cases between weekdays and weekends. Similar fluctuations were noticed also in other studies  
376 (Peccia et al., 2020). On December 12<sup>th</sup> some of the strict measures were released, e.g., retail stores  
377 opened to serve people but only at their entrance door and only through pre-scheduled appointments.  
378 As a result, after mid-November the number of infected cases gradually went down until it became  
379 pretty stable at below 100 daily cases in the first week of 2021.

380 **Figure 3** presents the experimentally determined relative shedding rate of viral RNA copies,  
381  $r_1(t)=R_{exp}/R_{expo}$ , in sewage from October 5<sup>th</sup>, 2020 to January 6<sup>th</sup>, 2021 for Thessaloniki. October 5<sup>th</sup> is the  
382 last day after summer that the measured viral RNA copies in wastewater fluctuated around the  
383 experimental limit of quantification of the employed technique (~10 viral RNA copies/mL).  $R_{exp}$   
384 represents the daily value of shedding rate, whereas  $R_{expo}$  is a reference shedding rate. Presenting  
385 experimental shedding data in the form of a ratio reduces the effect of determination uncertainty.  $R_{expo}$   
386 has been defined as the average  $R_{exp}$  value across the days of the first week of October which was a  
387 period with calm epidemiological conditions in the city (less than 10 daily reported cases).

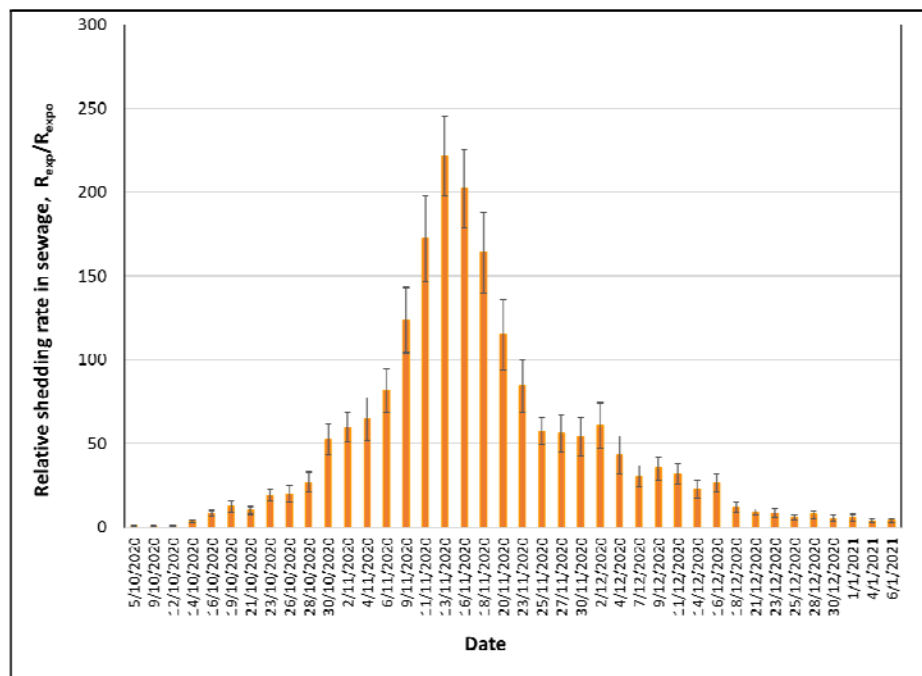

388

389 **Figure 3.** Experimental relative shedding rate in sewage expressed as the ratio of the measured daily  
390 shedding rate ( $R_{exp}$ ) over the reference shedding rate ( $R_{exp0}$ ) from October 5<sup>th</sup>, 2020 to January 6<sup>th</sup>, 2021.

391 There are certain similarities and differences between the medical surveillance data in **Figure 2** and the  
392 wastewater data in **Figure 3**. They both show an initial abrupt ascend followed by a later gradual  
393 decline. They both show a peak in the first half of November 2020. Yet, the peak in wastewater data is  
394 sharp at around November 13<sup>th</sup> whereas the peak in medical surveillance, despite the intense noise,  
395 looks like a plateau between November 3<sup>rd</sup> and 12<sup>th</sup>. The initial increasing slope in October's data in  
396 these Figures is a bit steeper for wastewater data implying that wastewater surveillance may act as an  
397 early warning indicator for medical surveillance. More about this below.

398 Next, the time series of the reported daily infected cases in the city of Thessaloniki is analyzed using the  
399 procedure in the previous section to determine the functions  $F$ ,  $g$ ,  $R$ . It is reminded that these three  
400 functions correspond respectively to (i) the total number of infected people with positive test at a  
401 calendar day,  $t$ , (those already registered as positive to day  $t$  but also those that will be tested in the

402 next days and their test result will be also registered to day  $t$ ), (ii) the distribution of the number of  
403 infected people with respect to the days of the disease,  $\tau$ , at a calendar day,  $t$ , and (iii) the total shedding  
404 rate with respect to the calendar day,  $t$ . It is important to note that since the temporal discretization  
405 quantity is one day, the continuous and the discrete forms of the above functions are arithmetically  
406 similar. Thus, the presented results can be read both as continuous functions (per day) or as discrete  
407 values (i.e., histograms). The essence of the proposed approach is that it accounts for the time  
408 dependence of the shedding rate during the disease. Yet, this is important only when the distribution of  
409 the daily shedding rates is not uniform among the population, but it evolves along the days of the  
410 disease.

411 Before a parametric analysis is performed it is useful to identify realistic range of values of the model  
412 parameters in order to examine their influence. It is reminded that the three model parameters are (i)  
413 the total number of shedding days counted from the infection day,  $\tau_e$ , (ii) the day of the maximum  
414 shedding rate,  $\tau_a$ , and (iii) the day of detection (specimen collection),  $\tau_d$ . The analysis of the data of  
415 Wölfel et al.(Wölfel et al., 2020) by Miura et al.(Miura et al., 2021) indicated an average shedding period  
416 of 26 days after the onset of symptoms. This is a bit longer than the 17 and 18 days, reported by Huang  
417 et al.(Huang et al., 2020) and Tan et al.(Tan et al., 2020), respectively. But both the latter studies  
418 reported a high variance in their average shedding period plus they mentioned that in some individuals  
419 shedding exceeded five weeks. Apart from this, Tan et al.(Tan et al., 2020), indicated a 6 day median  
420 incubation period from the day of infection until the day of symptoms onset. If one considers that the  
421 day of symptoms onset is a good candidate for the average day of maximum shedding rate then  $\tau_a=6$ .  
422 For Greek patients it is realistic to assume that specimen collection for medical testing takes place on  
423 the average about 3 days after the onset of symptoms. This is in line with information in literature that  
424 the median time period from symptom onset to hospital admission is 3 days(Huang et al., 2020).  
425 Therefore, a realistic average day of detection is  $\tau_d=8$ . The above information combined implies a total

426 number of shedding days  $\tau_e=32$  (6+26) and this is the value adopted herein. Summarizing, the base case  
427 parameter values around which parametric analysis is performed are  $\tau_a=6$ ,  $\tau_d=8$  and  $\tau_e=32$ .

428 **Figure 4** shows the computed values of  $g(\tau,t)$  for selected values of calendar days, namely, September  
429 25<sup>th</sup>, October 10<sup>th</sup>, October 23<sup>th</sup>, December 9<sup>th</sup> and December 29<sup>th</sup>, 2020. The small oscillation appeared  
430 is due to the oscillations in the curve  $f(t)$ . However, as  $f(t)$  – the positive tests count density- increases  
431 new patients are added to the number of infected people. The addition occurs at a higher rate than the  
432 rate of withdrawal of cured people. This leads to the accumulation of infected people at early shedding  
433 days,  $\tau$ , so the function  $g(\tau)$  acquires the characteristic, decreasing with  $\tau$ , profiles shown for October  
434 10<sup>th</sup> and October 23<sup>th</sup>. In the time regime of the maximum  $f(t)$ , e.g. curve for December 9<sup>th</sup>, the function  
435  $g(\tau)$  tends fast towards uniformity, like at the early shedding days. Finally, during the decreasing period  
436 of  $f(t)$ , e.g. curve for December 29<sup>th</sup>, the withdrawal of cured people rate overwhelms the entry of new  
437 patients so  $g(t)$  is an almost linearly increasing function of  $\tau$ . The above description manifests that the  
438 function  $g(\tau)$  varies a lot with calendar time  $t$  and it is far from uniform along the shedding days so the  
439 present analysis is necessary for the estimation of shedding rate across calendar days. It is clear that at a  
440 particular calendar day, infected people are at a different stage of the disease, and thus, at a different  
441 stage of viral shedding.

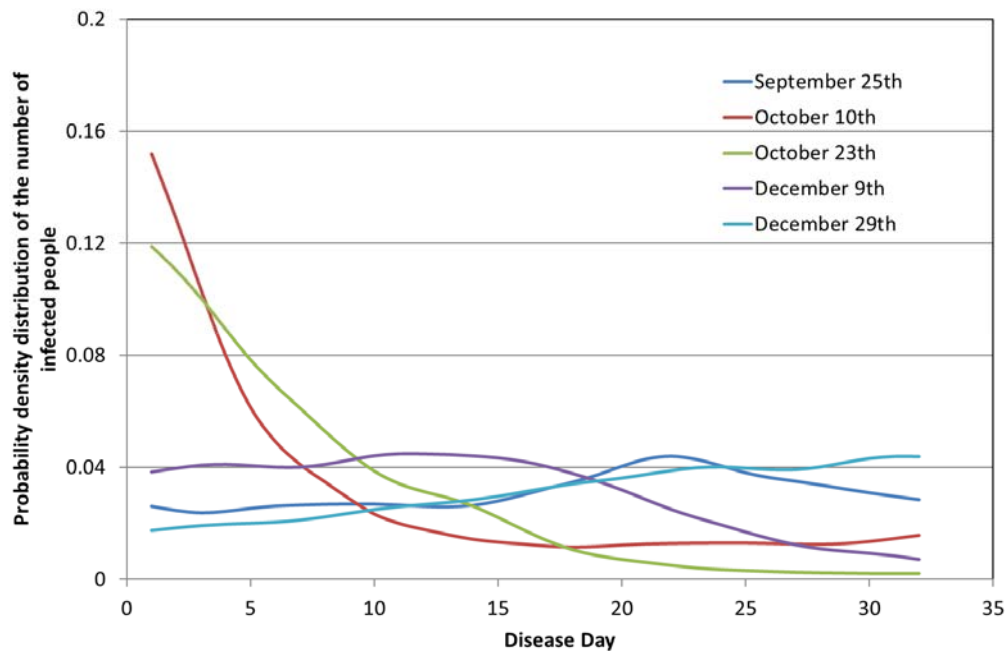

442

443 **Figure 4.** The probability density distribution of the number of infected people with respect to the days  
444 of the disease.

445 The early warning capacity of wastewater surveillance with respect to medical surveillance is estimated  
446 by comparing in **Figure 5** the dynamics of functions  $f(t)$ : daily reported infected people,  $F(t)$ : total  
447 reported infected people, and  $R(t)$ : experimentally determined viral shedding rate in sewage. More  
448 specifically, **Figure 5a** shows this comparison for the base case  $\tau_a=6$ ,  $\tau_d=8$ ,  $\tau_e=32$ ; **Figure 5b** for  $\tau_a=2$ ,  
449  $\tau_d=8$ ,  $\tau_e=32$ ; **Figure 5c** for  $\tau_a=12$ ,  $\tau_d=8$ ,  $\tau_e=32$  (all values in days). Curves in **Figure 5** stop at December 29<sup>th</sup>,  
450 2020, and not at January 6<sup>th</sup>, 2021. This is because calculations of  $F(t)$  -and accordingly of  $R(t)$ - can be  
451 performed only up to December 29<sup>th</sup>, 2020, as this function requires for every daily value available data  
452 for the subsequent  $\tau_d=8$  days. To avoid experimental noise in the parametric analysis, calculations in  
453 **Figure 5** are based on the Bayesian fitted curve in **Figure 2**. For the comparison it is imperative to  
454 express these three functions in a similar scale. This is done by transforming them in their probability  
455 density function counterparts. For the present case, this is done simply by dividing each function with  
456 the sum of its values for the period of interest. The function  $F(t)$  always resides after  $f(t)$  which is typical

457 for a cumulative type of function. The temporal distance apart between these two functions depends on  
 458 the values of the parameters  $\tau_d$  and  $\tau_e$ . This distance increases as  $\tau_d$  decreases and  $\tau_e$  increases. The  
 459 dynamics of the function  $R(t)$  depend also on  $\tau_a$ . In case of  $\tau_a < \tau_d$  then  $R(t)$  precedes  $f(t)$ . This condition is  
 460 extremely important as it demonstrates that for wastewater surveillance to precede medical  
 461 surveillance the day of the peak of viral shedding rate in stool during the disease days must lie before  
 462 the day of specimen collection for medical testing. In all other cases, the curve  $R(t)$  resides between  $f(t)$   
 463 and  $F(t)$ , with the latter being the approximate long time bound for the dynamics of  $R(t)$ . The previous  
 464 statement can be confirmed by observing the three aforementioned functions for the three set of  
 465 parameters in **Figure 5**. Depending on the calendar day, function  $R(t)$  precedes  $f(t)$  roughly from 0 to 4  
 466 days (**Figure 5b**). For the base case in **Figure 5a** the difference between  $R(t)$  and  $f(t)$  appears marginal.  
 467 Yet, one must recall that in **Figure 2** the ascending part of the Bayesian curve precedes raw data, so in  
 468 reality even for the base case sewage data lie earlier than medical data. In literature there is  
 469 experimental evidence of identifying SARS-CoV-2 in wastewater earlier than medical reporting by  
 470 several days, e.g., 2 days in Ottawa Canada(D'Acoust et al., 2021), 2-4 days in Montana USA(Nemudryi et  
 471 al., 2020). In summary, the viral shedding rate evolution curve measured in wastewater lies from a few  
 472 days before the curve of the number of daily infected people up to the curve of the total number of  
 473 infected people. The exact position of the curves depends on the relation between the day of maximum  
 474 shedding rate in stool and the day of specimen collection for medical testing.

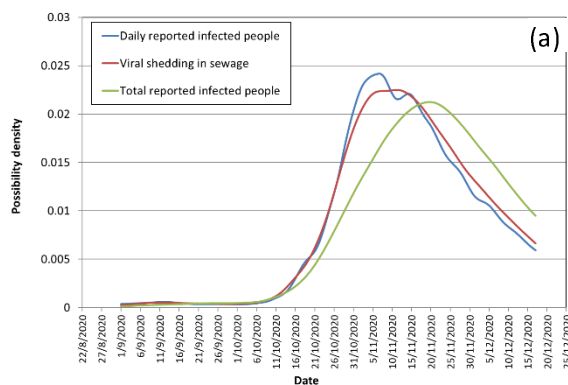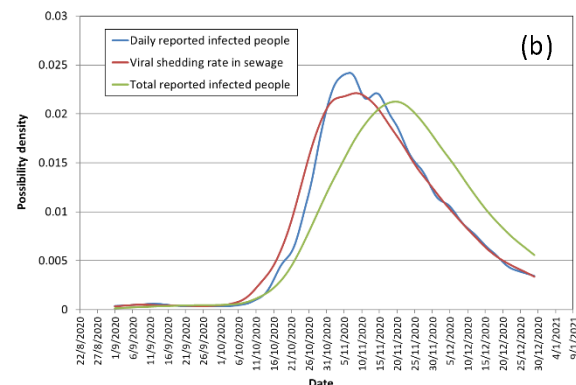



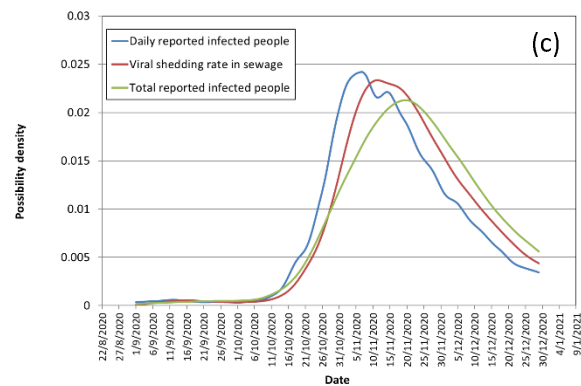

475 **Figure 5.** Comparison of the relative viral shedding rate in sewage with the number of the daily and total  
476 reported infected people per surveillance day. In all cases shedding duration in stool is set as 32days,  
477 laboratory test is assumed at DAY 8, whereas the day of shedding peak in stool is at: DAY 6 (a), DAY 2 (b)  
478 and DAY 12 (c).

479 For appraising in real life the early diagnostic capacity of wastewater surveillance it is important to  
480 compare wastewater data with medical surveillance data based on the date of reporting (and not on the  
481 date of specimen collection). Peccia et al.(Peccia et al., 2020) found in New Haven (USA) that although  
482 wastewater data was ahead by only 0-2 days of positive test results by the date of specimen collection,  
483 it was 6-8 days ahead of positive test results by the reporting date. In Thessaloniki (National Public  
484 Health Organization, 2020) the date of reporting follows the date of specimen collection by about 2 days  
485 on the average and so even the base case parameters in **Figure 5a** permit an early diagnosis capacity of  
486 wastewater surveillance of around 2 days.

487 A critical issue in the disease dynamics is the effect of the number of unreported infected people  
488 (unreported cases). Let us denote as  $U$  the ratio of unreported to reported infected people. If  $U$  is  
489 constant along the days of the shedding period, the analysis is exactly the same with that shown above  
490 for the reported infected people,  $F$ , since the probability density functions do not change. However, if  
491 the number of unreported people varies along the shedding period, then this may yield a time lag  
492 between wastewater and medical data. **Figure 6** compares the relative medical surveillance data of the

493 smoothed (Bayesian fit) daily reported cases,  $f(t)/f_0$ , versus the theoretically estimated relative shedding  
494 rate in wastewater,  $r_2(t)=R(t)/R_0$ . Normalization parameters,  $f_0$  and  $R_0$  are average values of the  
495 respective parameters over the same reference first week of October. Comparisons are for the base  
496 case  $\tau_a=6$ ,  $\tau_d=8$ ,  $\tau_e=32$ . The ratio  $U$  is assumed to vary proportionally with the number of reported  
497 infected people. The parameter  $U_{max}$  is used to parameterize  $U$  designating the maximum value of  $U$  for  
498 the case considered. The parameter  $U_{max}$  takes the value 0.5, 2 and 4 in **Figure 6**. Apparently, for  
499  $U_{max}=0.5$  (unreported cases becomes at most 50% of reported cases) wastewater and medical data  
500 coincide at the ascent of the curves but at the descent wastewater lags behind. This changes for  $U_{max}=2$   
501 (unreported cases becomes at most 200% of reported cases) and for  $U_{max}=4$  (unreported cases becomes  
502 at most 400% of reported cases) where wastewater data clearly go before medical data at the ascent of  
503 the curve. Summing up, a rising number of unreported cases as the shedding rate increases leads to  
504 earlier wastewater signal than medical surveillance. Furthermore, the higher the maximum number of  
505 unreported cases the more in advance the wastewater data from the medical data.

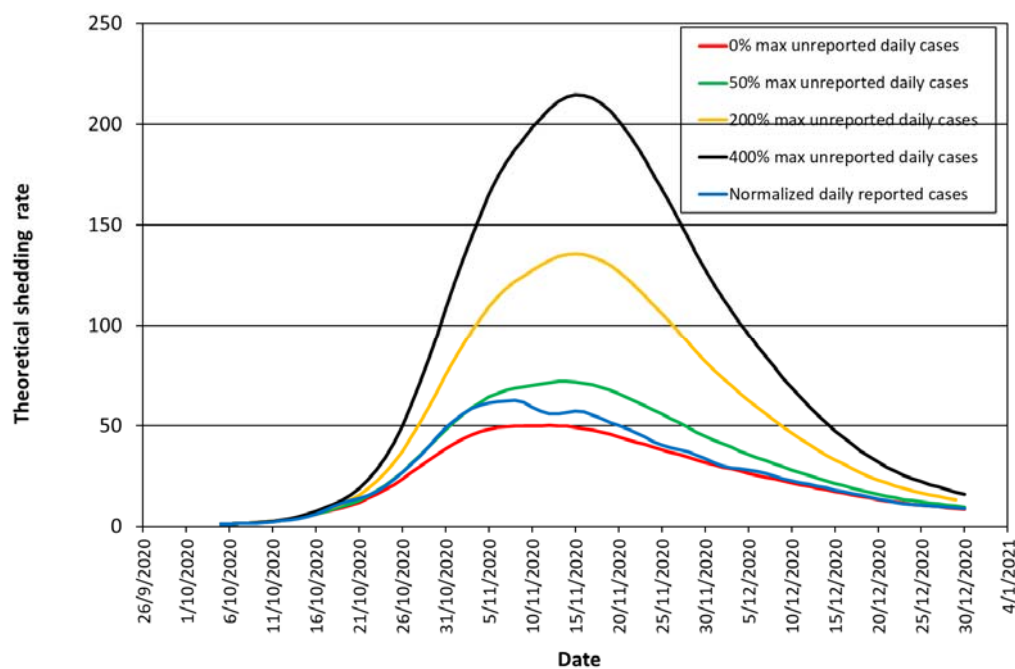

506

507 **Figure 6.** Comparison of the theoretical relative shedding rate in sewage with the relative medical  
508 surveillance data of the smoothed (Bayesian fit) daily reported cases for different scenarios of  
509 unreported daily cases. Unreported daily cases vary proportionally with the number of reported daily  
510 cases starting from 0 and reaching a maximum value of 0, 50, 200, 400% of reported cases at the date of  
511 maximum shedding rate.

512

513 Next, the experimental relative shedding rate,  $r_1(t)=R_{exp}(t)/R_{expo}$ , shown in **Figure 3** is compared with the  
514 estimated total number of infected people, including both reported and unreported ones, **Figure 7**. Red  
515 circles denote increasing shedding rates whereas green squares decreasing shedding rates, respectively.  
516 It is apparent that from low to moderate relative shedding rates ( $R_{exp}(t)/R_{expo} < 100$ ) and total number of  
517 infected people ( $F < 15000$ ) there is a roughly linear relationship between the two quantities. This  
518 changes dramatically for higher values of either quantities. Moreover, during the increasing phase of the  
519 relative shedding rate, i.e., outbreak of pandemic wave, the same number of infected people sheds a  
520 higher viral load than during the decreasing phase. This is so because at the outbreak phase of the  
521 pandemic most infected people are at the early phase of their disease when shedding rate is higher, as  
522 shown in **Figure 1**. In line with this, when the relative shedding rate starts to fall right after its peak, the  
523 total number of infected people continues to rise to about 10% more cases. This happens because the  
524 turning point (peak) of the curve designates the moment when the daily new infected cases begin to  
525 reduce, **Figure 2**, so the majority of the total number of infected people are at later phase of their  
526 disease when shedding rate is lower.

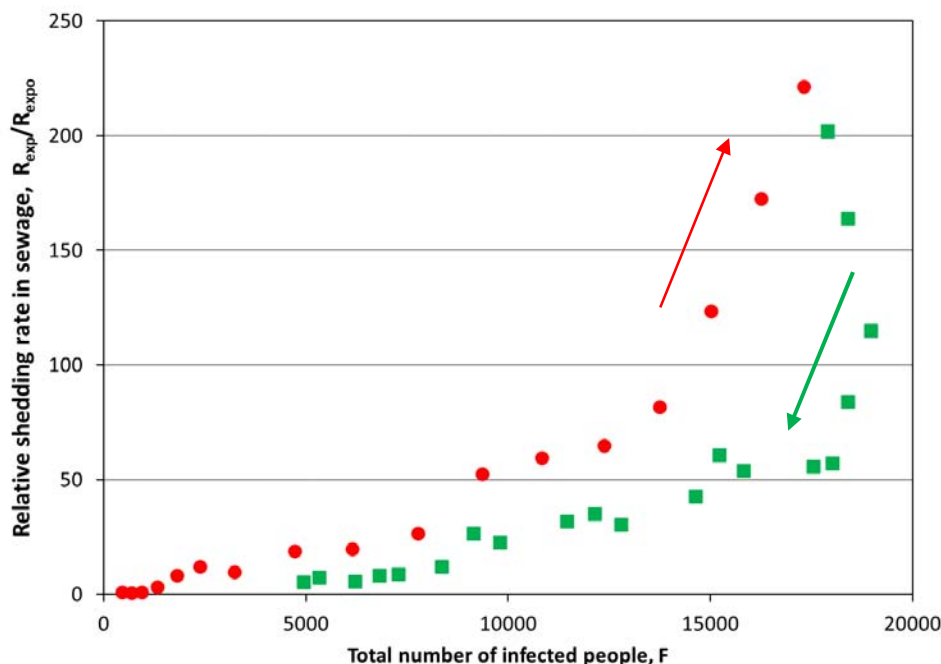

527

528 **Figure 7.** Experimental relative shedding rate in sewage,  $R_{exp}(t)/R_{exp0}$ , versus the estimated total number  
 529 of infected people (reported and unreported),  $F$ . The latter is estimated assuming that, on the average,  
 530 the shedding duration in stool is 32 days and medical tests are taken at DAY 8 during the disease. Red  
 531 circles denote increasing shedding rates whereas green squares denote decreasing shedding rates.

532 Let us now try to correlate the theoretically derived function  $R(t)$  with the actual one found from  
 533 experimental wastewater analysis  $R_{exp}(t)$ . The latter was shown as a relative shedding rate,  
 534  $r_1(t)=R_{exp}(t)/R_{exp0}$ , in **Figs 3** and **7**. Contrary to what was done in **Figure 6**, now the theoretically estimated  
 535 relative shedding rate  $r_2(t)=R(t)/R_0$  is computed from the noisy medical surveillance raw data in **Figure 2**  
 536 for the base case parameter values  $\tau_a=6$ ,  $\tau_d=8$  and  $\tau_e=32$ . As a result,  $r_2(t)$  data are also noisy. Therefore,  
 537  $\beta(t)=r_1(t)/r_2(t)$  is a ratio reflecting the total number of reported and unreported infected people,  $F(1+U)$ ,  
 538 over the total number of reported infected people,  $F$ , at every calendar day. In other words,  $\beta=1+U$ ,  
 539 that is,  $\beta-1$  stands for  $U$ , the ratio of the total unreported over the total reported cases. Thus, the  
 540 minimum value of  $\beta$  is 1 and corresponds to zero unreported cases. As before, the values of  $R_{exp0}$  and  $R_0$   
 541 both refer to the same reference first week of October. Selection of the reference week at an

542 epidemiologically calm period allows assuming that  $R_{\text{expo}}/R_0 \approx 1$  so the normalization in  $\beta$  can be ignored.  
543 The evolution of  $\beta$  with the calendar days appears in **Figure 8**. Considering the intense day-by-day  
544 scatter, the ratio  $\beta$  takes values roughly between 1 and 5, following a qualitatively similar trend with the  
545 wastewater shedding data in **Figure 3**. Interestingly, these results imply that there are essentially no  
546 unreported cases at periods of low shedding but unreported cases rise up to four times the reported  
547 ones ( $U/F \approx 4$ ) when shedding is maximum. Analysis of seroprevalence data in Qatar indicated that  
548 diagnosed infections represented about 10% of actual cases (Saththasivam et al., 2021). Another  
549 serological-testing study (Havers et al., 2020) showed that the actual number of infections could be from  
550 6 to 24 times the number of the reported cases. Overall, the presently estimated values of  $U/F$  from  $\sim 0$   
551 to 4 is close to the above published values. To our knowledge, this is the first time in the SARS-CoV-2  
552 pandemic that wastewater data are employed to indicate a proportion between unreported and  
553 reported infected cases. Moreover, the present study shows that the proportion of unreported to  
554 reported cases is not constant during the outbreak of a disease wave but as the number of infected  
555 people (and shedding rate) increases, it attains higher values and its scatter decreases.

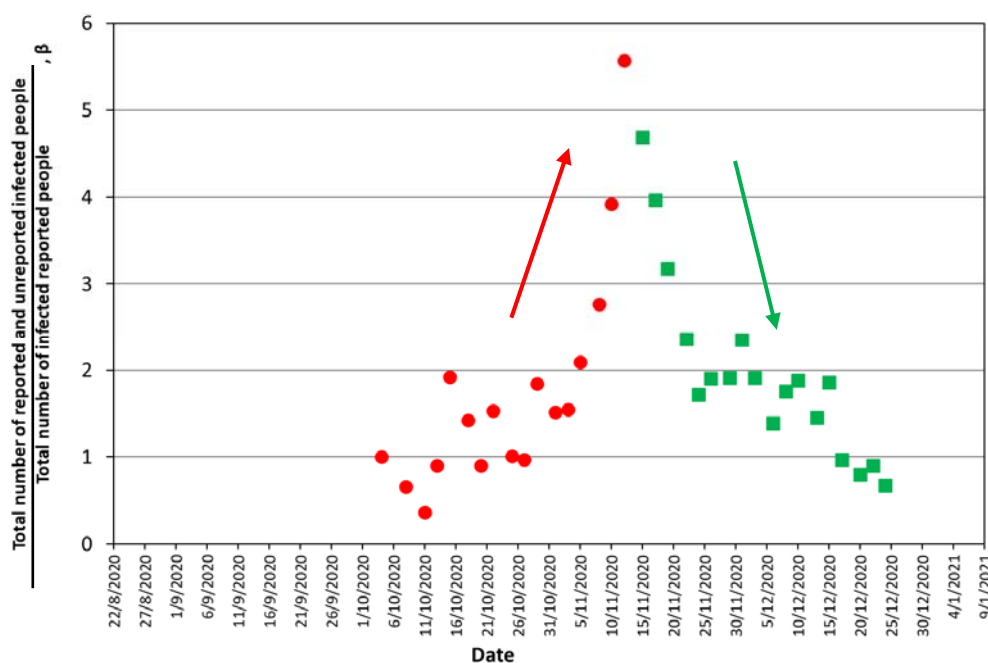

556

557 **Figure 8.** Evolution of the ratio of the total number of infected people (reported + unreported) over the  
558 number of reported infected people. The ratio is calculated from unsmoothed raw data in Figures 2 and  
559 3. Red circles denote increasing shedding rates whereas green squares denote decreasing shedding  
560 rates.

561

562 Based on the above, an effort is made to correlate  $\beta$  to the total number of the reported infected cases  
563 F. The result is shown in **Figure 9a** where once more red circles denote increasing shedding rates and  
564 green squares denote decreasing shedding rates. Alike in **Figure 7**,  $\beta$  starts decreasing before the  
565 maximum F is reached. In addition, at high F values there is a hysteresis in  $\beta$  between increasing and  
566 decreasing branches of the curves. This might imply that virus spread among unreported people is a bit  
567 higher in the declining phase of the disease either because of the cumulatively higher virus prevalence in  
568 the community or because more people undergo testing during the ascending spreading period of the  
569 disease than in the milder descending period. **Figure 9b** presents  $\beta$  versus the daily reported number of  
570 the infected cases,  $f$ . Interestingly there is an almost linear relation between the two parameters up to  
571 about 400 daily reported cases. After that point, spreading of the virus in the community is too high so  $\beta$   
572 depends on the total number infected people F and not on the daily reported cases.

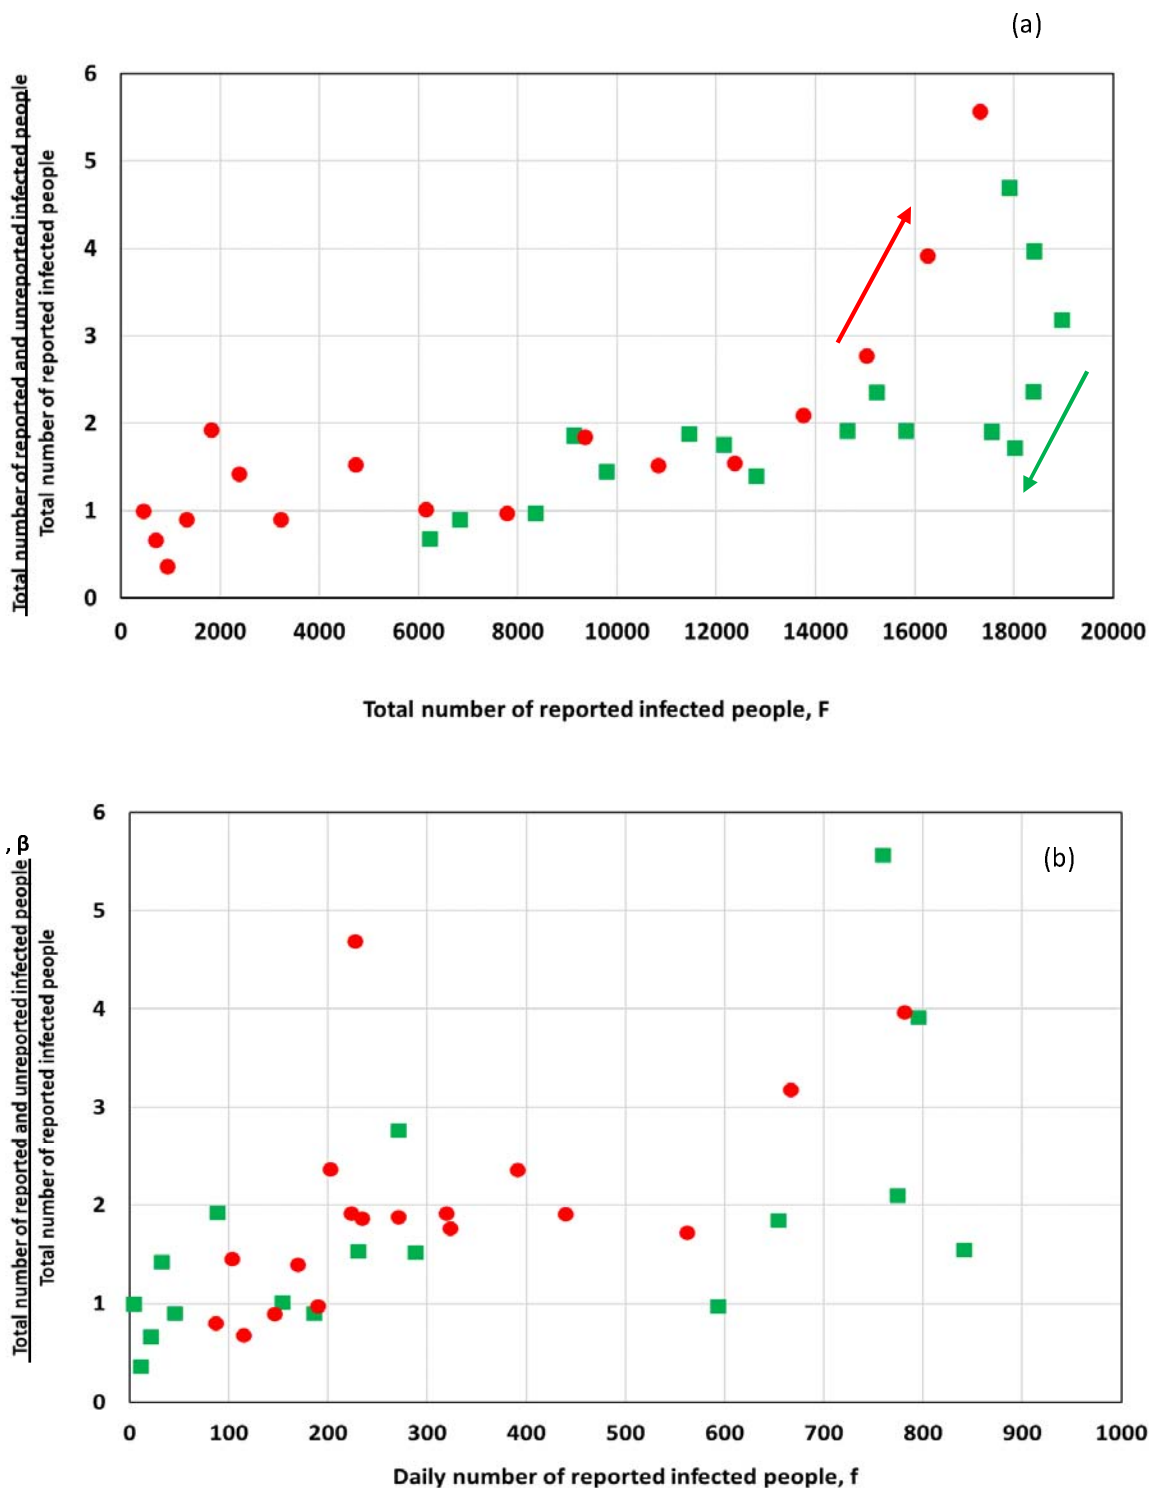

573 **Figure 9.** Variation of the ratio of the total number of infected people (reported + unreported) over the  
 574 number of reported infected people with regards to (a) the total number of reported infected people

575 and (b) the daily number of infected people. The ratio is calculated from unsmoothed raw data in  
576 Figures 2 and 3. Red circles denote increasing shedding rates whereas green squares denote decreasing  
577 shedding rates.

578 It must be mentioned that  $\beta$  may depend also on other quantities (apart from F and the  
579 ascending/descending mode), like the value of the F slope, but at present there are not enough data to  
580 support this. Having an estimation of the total number of infected people through  $\beta$ , a crude estimation  
581 of the product AB (average maximum virus shedding rate per person) is obtained. The estimated value  
582 of AB is at about  $2 \cdot 10^{11} \text{ day}^{-1}$ . This value is in fair proximity with that estimated by the wastewater  
583 analysis of Wu et al.(Wu et al., 2020). However, more work is needed to allow judging on the  
584 correctness of this value.

585

## 586 CONCLUSIONS

587 A mathematical model is developed that permits estimation of SARS-CoV-2 shedding rate in wastewater  
588 from the number of daily infected people (daily cases) announced by medical surveillance. The problem  
589 is complex as it requires a cumulative function of the total number of infected people at every calendar  
590 day and a function of the average shedding rate among infected individuals at every day along the  
591 course of the disease. Based on the limited available evidence in literature, a realistic function for the  
592 shedding rate of SARS-CoV-2 in stool of infected individuals is proposed which calls for an exponential  
593 increase of shedding rate from the day of infection to the day of symptoms onset, being followed by an  
594 exponential decay until the end of the disease. Three characteristic times describe this function: the day  
595 of maximum shedding rate, the day of detection (specimen collection) and the end day after the onset  
596 of the disease. Applying this model to the public health surveillance data for the city of Thessaloniki  
597 (~700,000 inhabitants, North Greece) a thorough parametric study is performed. It is shown that for



598 WBE to afford an early warning capacity, the day of maximum shedding rate must precede the day of  
599 detection by a few days. In particular, at the beginning of an outbreak curve, a 4-day early WBE signal  
600 requires these two characteristic times to be apart by 6 days. For Thessaloniki where on the average  
601 these two characteristic times are apart by just 2 days but, additionally, the day of reporting follows the  
602 date of specimen collection also by about 2 days, the early diagnosis capacity of wastewater surveillance  
603 is around 2 days. Furthermore, comparison of wastewater surveillance and public health data indicates  
604 the existence of a number of unreported infected people. For Thessaloniki in the outbreak of November  
605 2020, this number was negligible at epidemiologically calm days with low shedding rate but went up to  
606 four times the number of reported people when shedding rate reached a climax at mid-November 2020.  
607 Interestingly, the presence of an increasing number of unreported cases with shedding rate enhances  
608 the early warning capacity of WBE. To this end, the present model is an essential tool to investigate the  
609 dynamics of virus spreading based on wastewater measurements. When such knowledge is adequately  
610 acquired then the inverse problem of estimating the number of cases from wastewater data can be  
611 attempted.

612

## 613 REFERENCES

614 Ahmed, W., Angel, N., Edson, J., Bibby, K., Bivins, A., O'Brien, J.W., Choi, P.M., Kitajima, M., Simpson,  
615 S.L., Li, J., Tschärke, B., Verhagen, R., Smith, W.J.M., Zaugg, J., Dierens, L., Hugenholtz, P., Thomas,  
616 K. v., Mueller, J.F., 2020. First confirmed detection of SARS-CoV-2 in untreated wastewater in  
617 Australia: A proof of concept for the wastewater surveillance of COVID-19 in the community.  
618 Science of the Total Environment 728, 138764. <https://doi.org/10.1016/j.scitotenv.2020.138764>

- 619 CDC, 2021. CDC [WWW Document]. Center for Disease Control and Prevention, CDC. URL  
620 [https://www.cdc.gov/coronavirus/2019-ncov/cases-updates/wastewater-surveillance/public-](https://www.cdc.gov/coronavirus/2019-ncov/cases-updates/wastewater-surveillance/public-health-interpretation.html)  
621 [health-interpretation.html](https://www.cdc.gov/coronavirus/2019-ncov/cases-updates/wastewater-surveillance/public-health-interpretation.html) (accessed 3.10.21).
- 622 Chaintoutis, S.C., Papadopoulou, E., Melidou, A., Papa, A., Dovas, C.I., 2019. A PCR-based NGS protocol  
623 for whole genome sequencing of West Nile virus lineage 2 directly from biological specimens.  
624 *Molecular and Cellular Probes* 46, 101412. <https://doi.org/10.1016/j.mcp.2019.06.002>
- 625 Corman, V.M., Landt, O., Kaiser, M., Molenkamp, R., Meijer, A., Chu, D.K.W., Bleicker, T., Brünink, S.,  
626 Schneider, J., Schmidt, M.L., Mulders, D.G.J.C., Haagmans, B.L., van der Veer, B., van den Brink, S.,  
627 Wijsman, L., Goderski, G., Romette, J.L., Ellis, J., Zambon, M., Peiris, M., Goossens, H., Reusken, C.,  
628 Koopmans, M.P.G., Drosten, C., 2020. Detection of 2019 novel coronavirus (2019-nCoV) by real-  
629 time RT-PCR. *Eurosurveillance* 25. <https://doi.org/10.2807/1560-7917.ES.2020.25.3.2000045>
- 630 D'Aoust, P.M., Mercier, E., Montpetit, D., Jia, J.J., Alexandrov, I., Neault, N., Baig, A.T., Mayne, J., Zhang,  
631 X., Alain, T., Langlois, M.A., Servos, M.R., MacKenzie, M., Figeys, D., MacKenzie, A.E., Graber, T.E.,  
632 Delatolla, R., 2021. Quantitative analysis of SARS-CoV-2 RNA from wastewater solids in  
633 communities with low COVID-19 incidence and prevalence. *Water Research* 188, 116560.  
634 <https://doi.org/10.1016/j.watres.2020.116560>
- 635 Gonzalez, R., Curtis, K., Bivins, A., Bibby, K., Weir, M.H., Yetka, K., Thompson, H., Keeling, D., Mitchell, J.,  
636 Gonzalez, D., 2020. COVID-19 surveillance in Southeastern Virginia using wastewater-based  
637 epidemiology. *Water Research* 186, 116296. <https://doi.org/10.1016/j.watres.2020.116296>
- 638 Guan, W., Ni, Z., Hu, Yu, Liang, W., Ou, C., He, J., Liu, L., Shan, H., Lei, C., Hui, D.S.C., Du, B., Li, L., Zeng,  
639 G., Yuen, K.-Y., Chen, R., Tang, C., Wang, T., Chen, P., Xiang, J., Li, S., Wang, Jin-lin, Liang, Z., Peng,  
640 Y., Wei, L., Liu, Y., Hu, Ya-hua, Peng, P., Wang, Jian-ming, Liu, J., Chen, Z., Li, G., Zheng, Z., Qiu, S.,

- 641 Luo, J., Ye, C., Zhu, S., Zhong, N., 2020. Clinical Characteristics of Coronavirus Disease 2019 in China.  
642 New England Journal of Medicine 382, 1708–1720. <https://doi.org/10.1056/nejmoa2002032>
- 643 Havers, F.P., Reed, C., Lim, T., Montgomery, J.M., Klena, J.D., Hall, A.J., Fry, A.M., Cannon, D.L., Chiang,  
644 C.F., Gibbons, A., Krapivunaya, I., Morales-Betoulle, M., Roguski, K., Rasheed, M.A.U., Freeman, B.,  
645 Lester, S., Mills, L., Carroll, D.S., Owen, S.M., Johnson, J.A., Semenova, V., Blackmore, C., Blog, D.,  
646 Chai, S.J., Dunn, A., Hand, J., Jain, S., Lindquist, S., Lynfield, R., Pritchard, S., Sokol, T., Sosa, L.,  
647 Turabelidze, G., Watkins, S.M., Wiesman, J., Williams, R.W., Yendell, S., Schiffer, J., Thornburg, N.J.,  
648 2020. Seroprevalence of Antibodies to SARS-CoV-2 in 10 Sites in the United States, March 23-May  
649 12, 2020. JAMA Internal Medicine 180, 1776–1786.  
650 <https://doi.org/10.1001/jamainternmed.2020.4130>
- 651 He, X., Lau, E.H.Y., Wu, P., Deng, X., Wang, J., Hao, X., Lau, Y.C., Wong, J.Y., Guan, Y., Tan, X., Mo, X.,  
652 Chen, Y., Liao, B., Chen, W., Hu, F., Zhang, Q., Zhong, M., Wu, Y., Zhao, L., Zhang, F., Cowling, B.J.,  
653 Li, F., Leung, G.M., 2020. Temporal dynamics in viral shedding and transmissibility of COVID-19.  
654 Nature Medicine 26, 672–675. <https://doi.org/10.1038/s41591-020-0869-5>
- 655 Huang, J., Mao, T., Li, S., Wu, L., Xu, X., Li, H., Xu, C., Su, F., Dai, J., Shi, J., Cai, J., Huang, C., Lin, X., Chen,  
656 D., Lin, X.L., Sun, B., Tang, S., 2020. Long period dynamics of viral load and antibodies for SARS-CoV-  
657 2 infection: An observational cohort study. medRxiv.  
658 <https://doi.org/10.1101/2020.04.22.20071258>
- 659 la Rosa, G., Iaconelli, M., Mancini, P., Bonanno Ferraro, G., Veneri, C., Bonadonna, L., Lucentini, L.,  
660 Suffredini, E., 2020. First detection of SARS-CoV-2 in untreated wastewaters in Italy. Science of the  
661 Total Environment 736. <https://doi.org/10.1016/j.scitotenv.2020.139652>

- 662 Lauer, S.A., Grantz, K.H., Bi, Q., Jones, F.K., Zheng, Q., Meredith, H.R., Azman, A.S., Reich, N.G., Lessler, J.,  
663 2020. The incubation period of coronavirus disease 2019 (CoVID-19) from publicly reported  
664 confirmed cases: Estimation and application. *Annals of Internal Medicine* 172, 577–582.  
665 <https://doi.org/10.7326/M20-0504>
- 666 Li, Q., Guan, X., Wu, P., Wang, X., Zhou, L., Tong, Y., Ren, R., Leung, K.S.M., Lau, E.H.Y., Wong, J.Y., Xing,  
667 X., Xiang, N., Wu, Y., Li, C., Chen, Q., Li, D., Liu, T., Zhao, J., Liu, M., Tu, W., Chen, C., Jin, L., Yang, R.,  
668 Wang, Q., Zhou, S., Wang, R., Liu, H., Luo, Y., Liu, Y., Shao, G., Li, H., Tao, Z., Yang, Y., Deng, Z., Liu,  
669 B., Ma, Z., Zhang, Y., Shi, G., Lam, T.T.Y., Wu, J.T., Gao, G.F., Cowling, B.J., Yang, B., Leung, G.M.,  
670 Feng, Z., 2020. Early Transmission Dynamics in Wuhan, China, of Novel Coronavirus–Infected  
671 Pneumonia. *New England Journal of Medicine* 382, 1199–1207.  
672 <https://doi.org/10.1056/nejmoa2001316>
- 673 Medema, G., Been, F., Heijnen, L., Petterson, S., 2020a. Implementation of environmental surveillance  
674 for SARS-CoV-2 virus to support public health decisions: Opportunities and challenges. *Current*  
675 *Opinion in Environmental Science and Health* 17, 49–71.  
676 <https://doi.org/10.1016/j.coesh.2020.09.006>
- 677 Medema, G., Heijnen, L., Elsinga, G., Italiaander, R., Brouwer, A., 2020b. Presence of SARS-Coronavirus-2  
678 RNA in Sewage and Correlation with Reported COVID-19 Prevalence in the Early Stage of the  
679 Epidemic in The Netherlands. *Environmental Science & Technology Letters* 7, 511–516.  
680 <https://doi.org/10.1021/acs.estlett.0c00357>
- 681 Miura, F., Kitajima, M., Omori, R., 2021. Duration of SARS-CoV-2 viral shedding in faeces as a parameter  
682 for wastewater-based epidemiology: Re-analysis of patient data using a shedding dynamics model.  
683 *Science of the Total Environment* 769, 144549. <https://doi.org/10.1016/j.scitotenv.2020.144549>

- 684 National Public Health Organization, 2020. Daily reports COVID-19 2020. URL  
685 [https://eody.gov.gr/epidimiologika-statistika-dedomena/ektheseis-covid-19/imerisies-ektheseis-](https://eody.gov.gr/epidimiologika-statistika-dedomena/ektheseis-covid-19/imerisies-ektheseis-covid-19-2020/)  
686 [covid-19-2020/](https://eody.gov.gr/epidimiologika-statistika-dedomena/ektheseis-covid-19/imerisies-ektheseis-covid-19-2020/) (accessed 5.14.21).
- 687 Nemudryi, A., Nemudraia, A., Wiegand, T., Surya, K., Buyukyoruk, M., Cicha, C., Vanderwood, K.K.,  
688 Wilkinson, R., Wiedenheft, B., 2020. Temporal Detection and Phylogenetic Assessment of SARS-  
689 CoV-2 in Municipal Wastewater. *Cell Reports Medicine* 1, 100098.  
690 <https://doi.org/10.1016/j.xcrm.2020.100098>
- 691 Peccia, J., Zulli, A., Brackney, D.E., Grubaugh, N.D., Kaplan, E.H., Casanovas-Massana, A., Ko, A.I., Malik,  
692 A.A., Wang, D., Wang, M., Warren, J.L., Weinberger, D.M., Arnold, W., Omer, S.B., 2020.  
693 Measurement of SARS-CoV-2 RNA in wastewater tracks community infection dynamics. *Nature*  
694 *Biotechnology* 38, 1164–1167. <https://doi.org/10.1038/s41587-020-0684-z>
- 695 Petala, M., Dafou, D., Kostoglou, M., Karapantsios, T., Kanata, E., Chatziefstathiou, A., Sakaveli, F.,  
696 Kotoulas, K., Arsenakis, M., Roilides, E., Sklaviadis, T., Metallidis, S., Papa, A., Stylianidis, E.,  
697 Papadopoulos, A., Papaioannou, N., 2021. A physicochemical model for rationalizing SARS-CoV-2  
698 concentration in sewage. Case study: The city of Thessaloniki in Greece. *Science of the Total*  
699 *Environment* 755, 142855. <https://doi.org/10.1016/j.scitotenv.2020.142855>
- 700 Saththasivam, J., El-Malah, S.S., Gomez, T.A., Jabbar, K.A., Remanan, R., Krishnankutty, A.K., Ogunbiyi,  
701 O., Rasool, K., Ashhab, S., Rashkeev, S., Bensaad, M., Ahmed, A.A., Mohamoud, Y.A., Malek, J.A.,  
702 Abu Raddad, L.J., Jeremijenko, A., Abu Halaweh, H.A., Lawler, J., Mahmoud, K.A., 2021. COVID-19  
703 (SARS-CoV-2) outbreak monitoring using wastewater-based epidemiology in Qatar. *Science of the*  
704 *Total Environment* 774, 145608. <https://doi.org/10.1016/j.scitotenv.2021.145608>

705 Sellaoui, L., Badawi, M., Monari, A., Tatarchuk, T., Jemli, S., 2020. Since January 2020 Elsevier has  
706 created a COVID-19 resource centre with free information in English and Mandarin on the novel  
707 coronavirus COVID- 19 . The COVID-19 resource centre is hosted on Elsevier Connect , the company  
708 ' s public news and information .

709 SET-C Steering Committee, 2020. Reproduction number (R) and growth rate (r) of the COVID-19  
710 epidemic in the UK 1–86.

711 Siegel, A., Chang, P.J., Jarou, Z.J., Paushter, D.M., Harmath, C.B., Arevalo, J. ben, Dachman, A., 2020.  
712 Lung base findings of coronavirus disease (COVID-19) on abdominal CT in patients with  
713 predominant gastrointestinal symptoms. American Journal of Roentgenology 215, 607–609.  
714 <https://doi.org/10.2214/AJR.20.23232>

715 Tan, W., Lu, Y., Zhang, J., Wang, J., Dan, Y., Tan, Z., He, X., Qian, C., Sun, Q., Hu, Q., Liu, H., Ye, S., Xiang,  
716 X., Zhou, Y., Zhang, W., Guo, Y., Wang, X.H., He, W., Wan, X., Sun, F., Wei, Q., Chen, C., Pan, G., Xia,  
717 J., Mao, Q., Chen, Y., Deng, G., 2020. Viral kinetics and antibody responses in patients with COVID-  
718 19. medRxiv. <https://doi.org/10.1101/2020.03.24.20042382>

719 Wölfel, R., Corman, V.M., Guggemos, W., Seilmaier, M., Zange, S., Müller, M.A., Niemeyer, D., Jones,  
720 T.C., Vollmar, P., Rothe, C., Hoelscher, M., Bleicker, T., Brünink, S., Schneider, J., Ehmann, R.,  
721 Zwirgmaier, K., Drosten, C., Wendtner, C., 2020. Virological assessment of hospitalized patients  
722 with COVID-2019. Nature 581, 465. <https://doi.org/10.1038/s41586-020-2196-x>

723 Wu, F., Zhang, J., Xiao, A., Gu, X., Lee, W.L., Armas, F., Kauffman, K., Hanage, W., Matus, M., Ghaeli, N.,  
724 Endo, N., Duvallet, C., Poyet, M., Moniz, K., Washburne, A.D., Erickson, T.B., Chai, P.R., Thompson,  
725 J., Alm, E.J., 2020. SARS-CoV-2 Titers in Wastewater Are Higher than Expected from Clinically  
726 Confirmed Cases. mSystems 5. <https://doi.org/10.1128/mSystems.00614-20>

727 Wurtzer<sup>1</sup>, S., Marechal, V., Mouchel<sup>4</sup>, J.M., Maday, Y., Teyssou<sup>6</sup>, R., Richard<sup>1</sup>, E., Almayrac<sup>7</sup>, J.L., Moulin<sup>1</sup>,  
728 L., n.d. Evaluation of lockdown effect on SARS-CoV-2 dynamics through viral genome quantification  
729 in waste water 1. <https://doi.org/10.2807/1560-7917>

730 Ye, Y., 2018. The Detection and Fate of Enveloped Viruses in Water Environments 149.

731 Zheng, S., Fan, J., Yu, F., Feng, B., Lou, B., Zou, Q., Xie, G., Lin, S., Wang, R., Yang, X., Chen, W., Wang, Q.,  
732 Zhang, D., Liu, Y., Gong, R., Ma, Z., Lu, S., Xiao, Y., Gu, Y., Zhang, J., Yao, H., Xu, K., Lu, X., Wei, G.,  
733 Zhou, J., Fang, Q., Cai, H., Qiu, Y., Sheng, J., Chen, Y., Liang, T., 2020. Viral load dynamics and  
734 disease severity in patients infected with SARS-CoV-2 in Zhejiang province, China, January-March  
735 2020: Retrospective cohort study. The BMJ 369. <https://doi.org/10.1136/bmj.m1443>

736

737
